# Supplementary material
Source: publisher figshare collection journal article supplement (https://tandf.figshare.com/ndownloader/files/22721042)

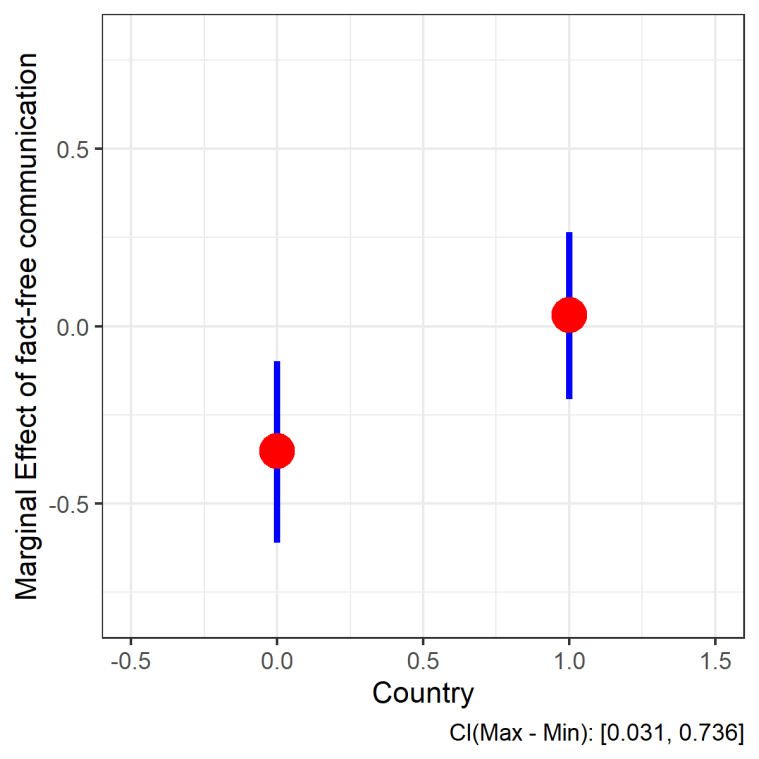
Supplemental Material – Comparing the effects of misinformation and corrective information across two countries


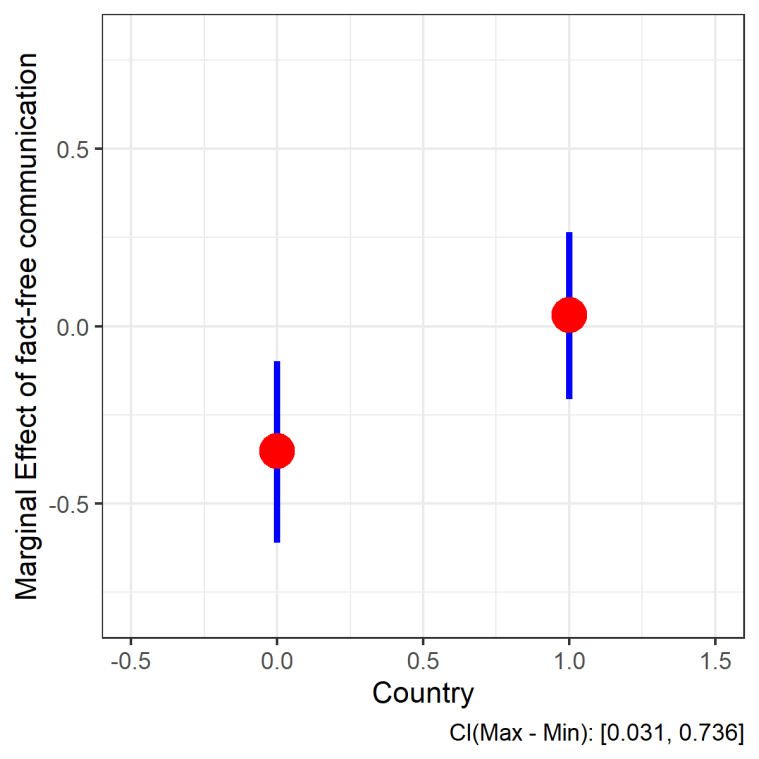


US Netherlands US Netherlands

*Figure 1a*. The effects of fact-free misinformation on perceived accuracy (left) and issue agreement (right) in the US and the Netherlands.


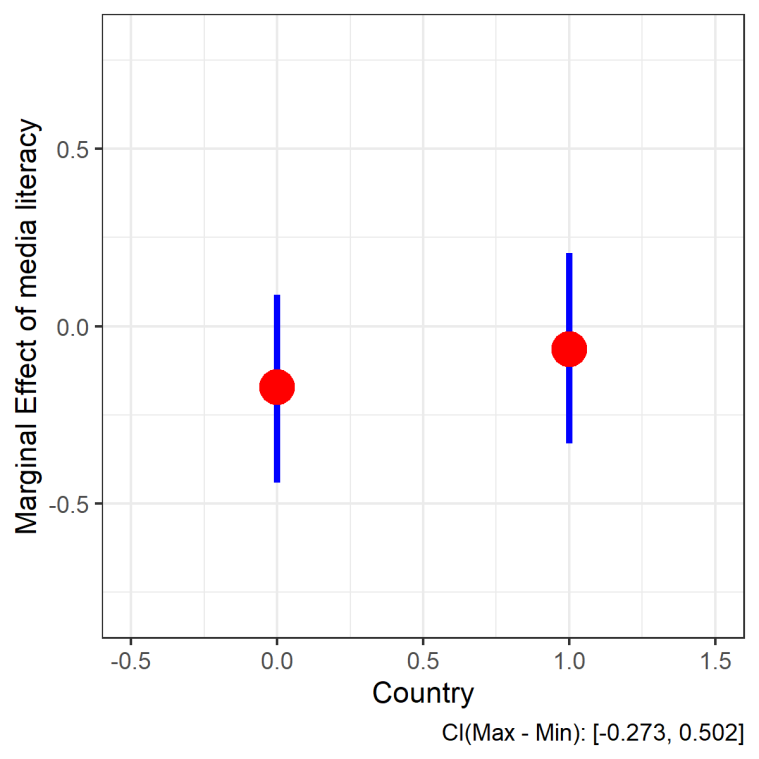

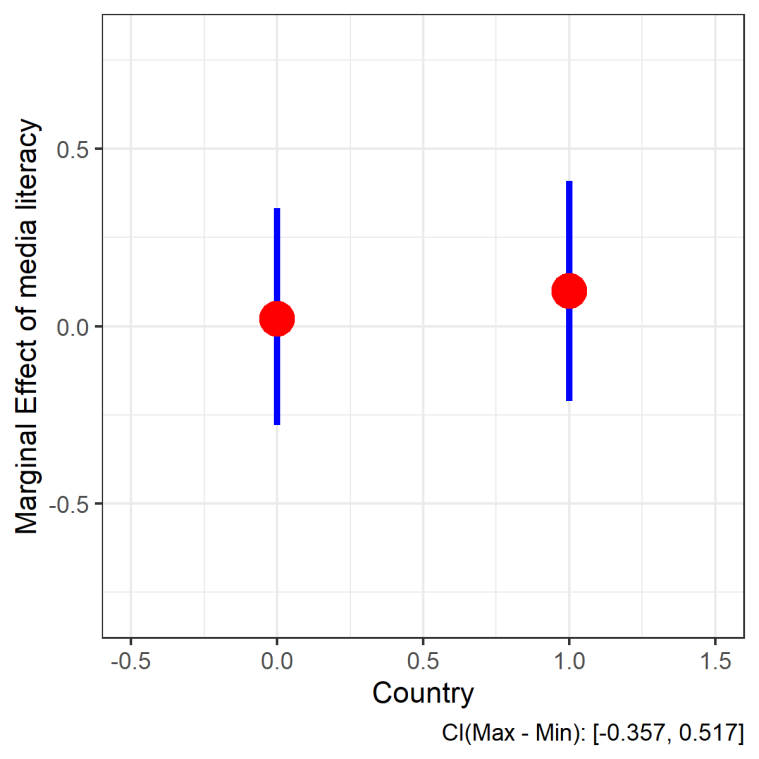


US Netherlands US Netherlands

*Figure 1b*. The effects of media literacy on perceived accuracy (left) and issue agreement (right) in the US and the Netherlands.


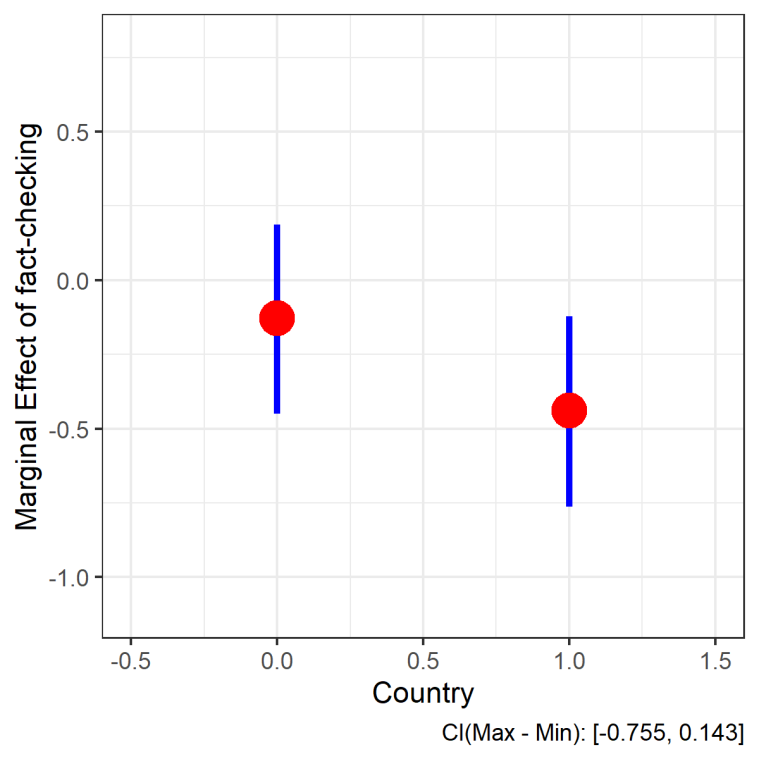

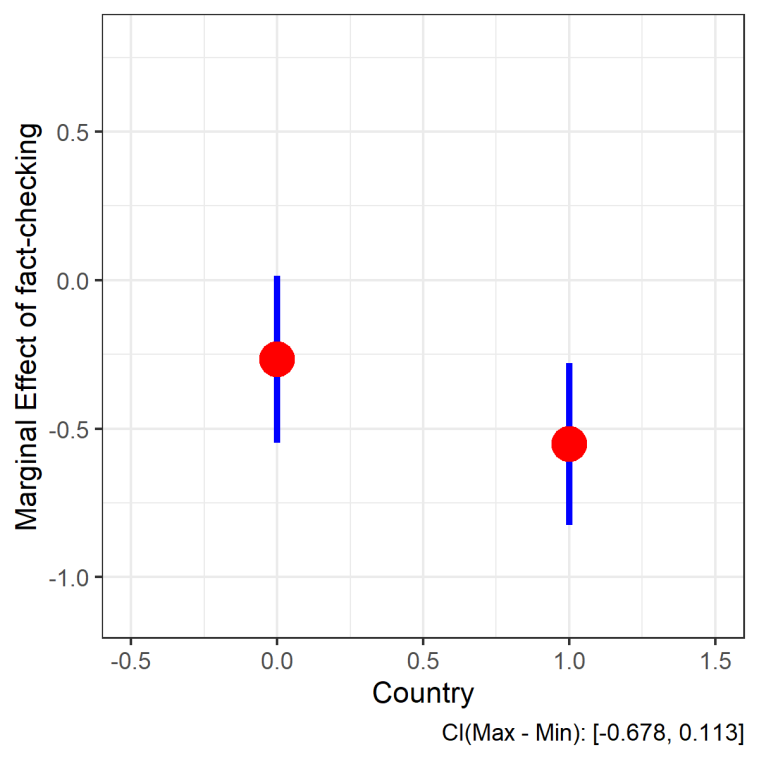


US Netherlands US Netherlands

*Figure 1c*. The effects of fact-checkers on perceived accuracy (left) and issue agreement (right) in the US and the Netherlands.


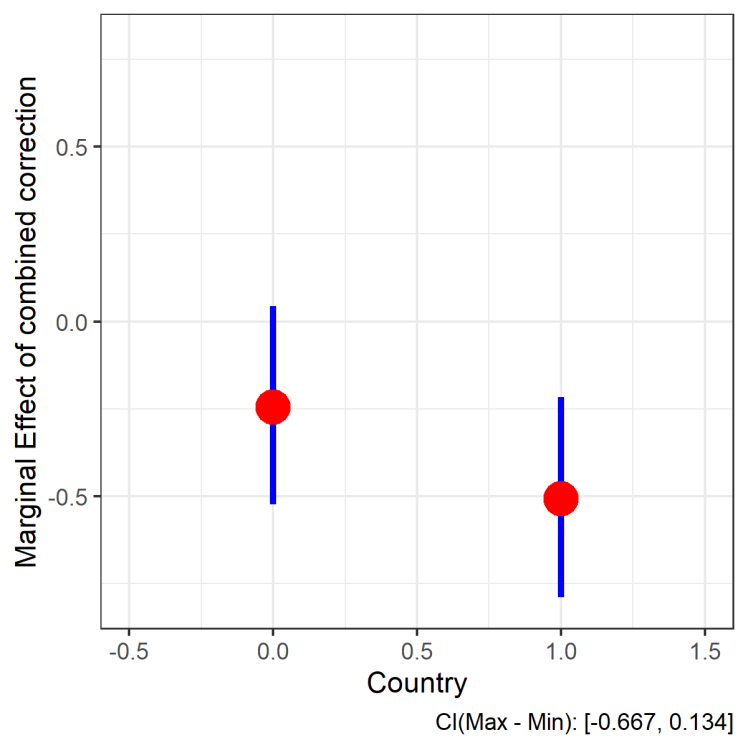

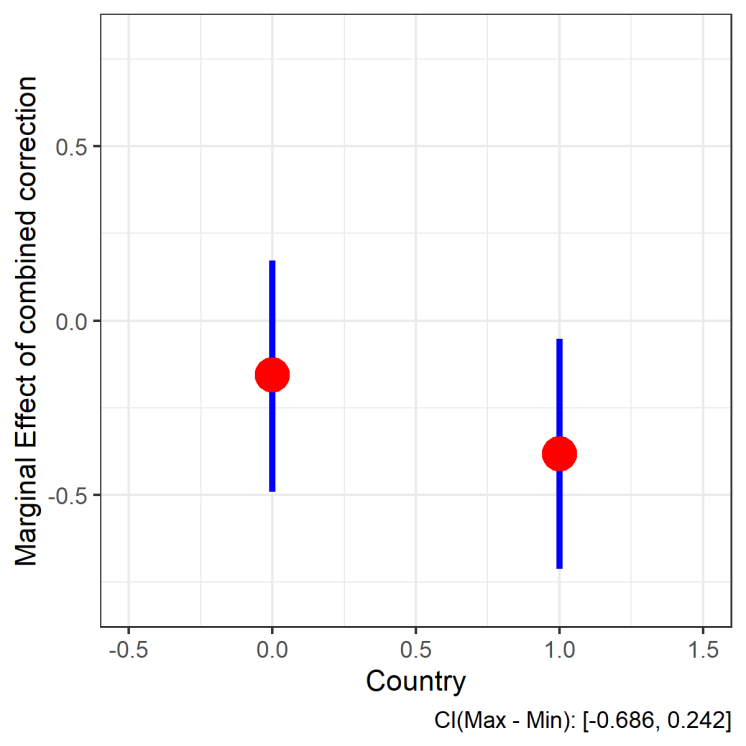


US Netherlands US Netherlands

*Figure 1d*. The effects of combined refutations on perceived accuracy (left) and issue agreement (right) in the US and the Netherlands.

Supplemental Material – Estimates of the effects of fact-free communication and corrective information on perceived accuracy and issue agreement in the Netherlands and the US.


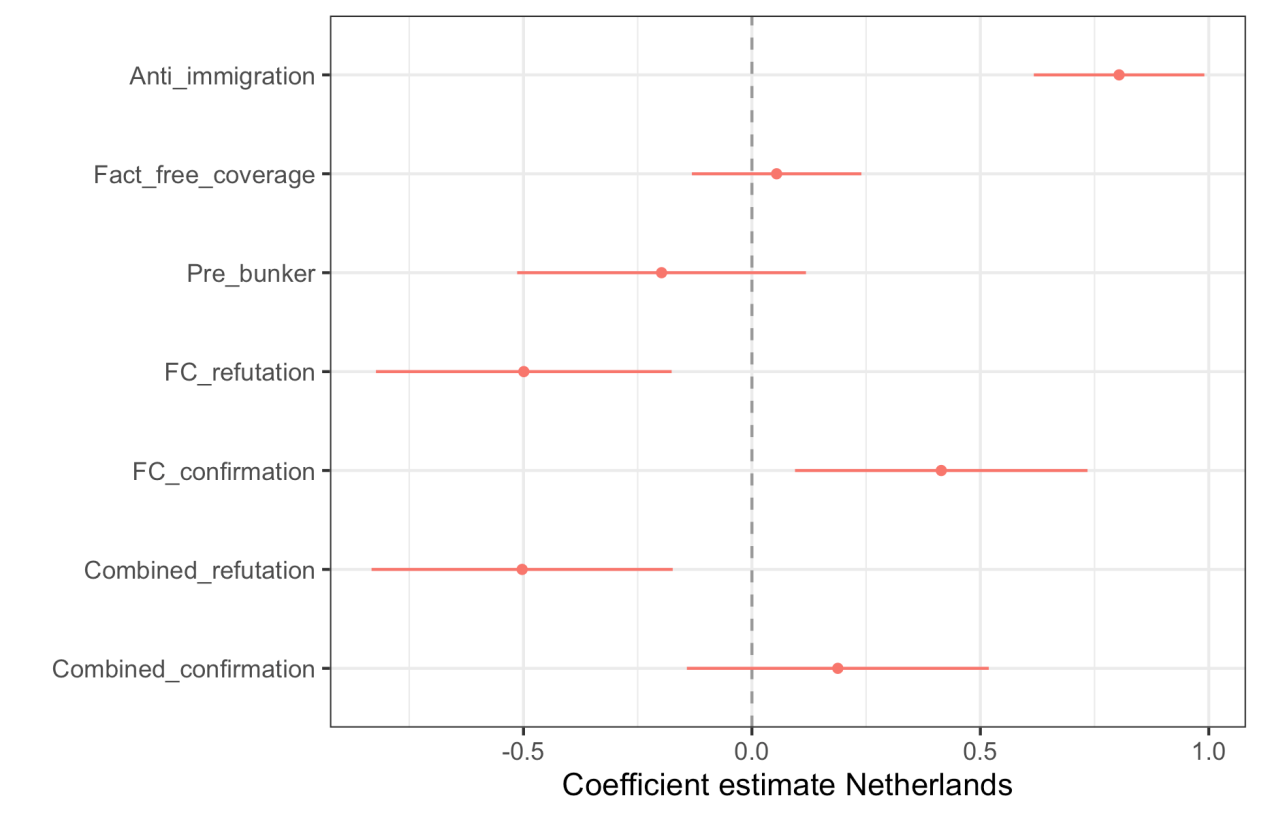


*Figure 2a.* The effects of corrective efforts on perceived accuracy in the Netherlands


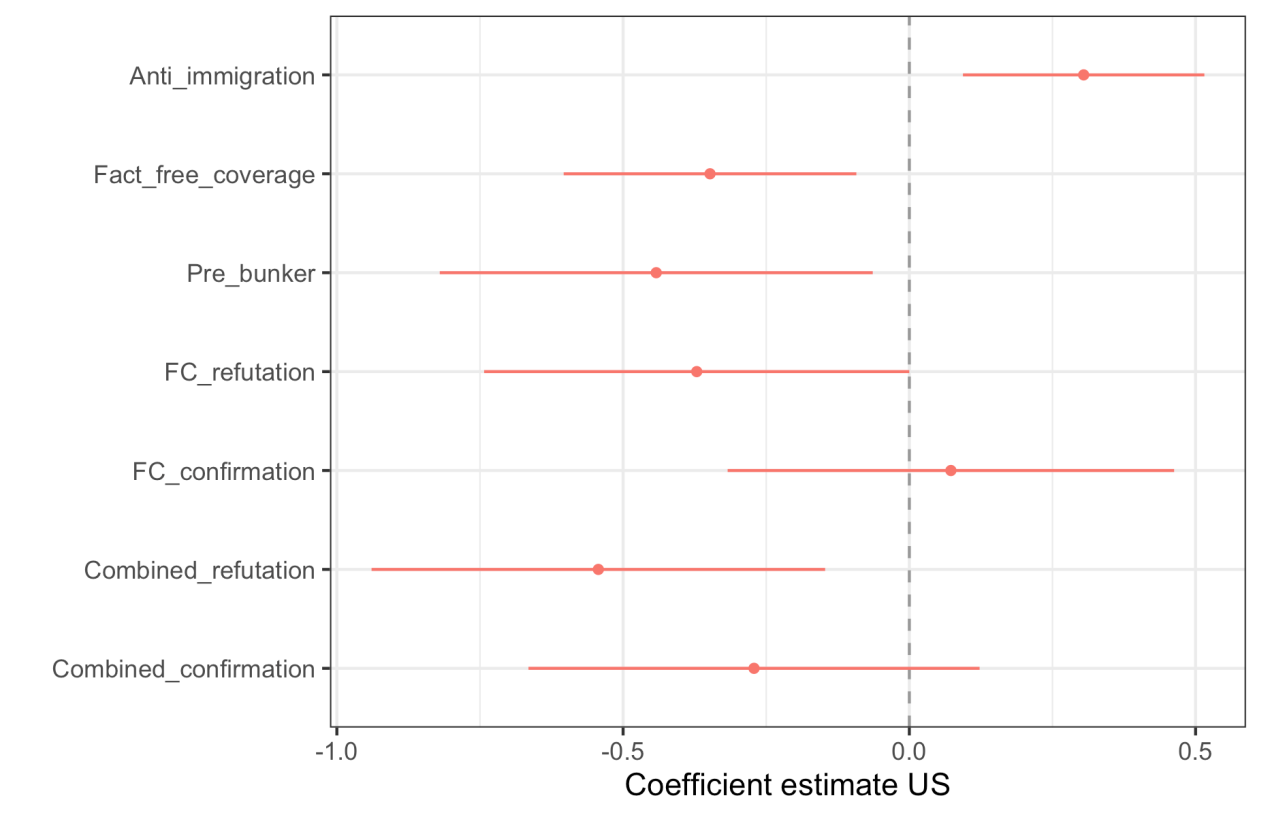


*Figure 2b.* The effects of corrective efforts on perceived accuracy in the US


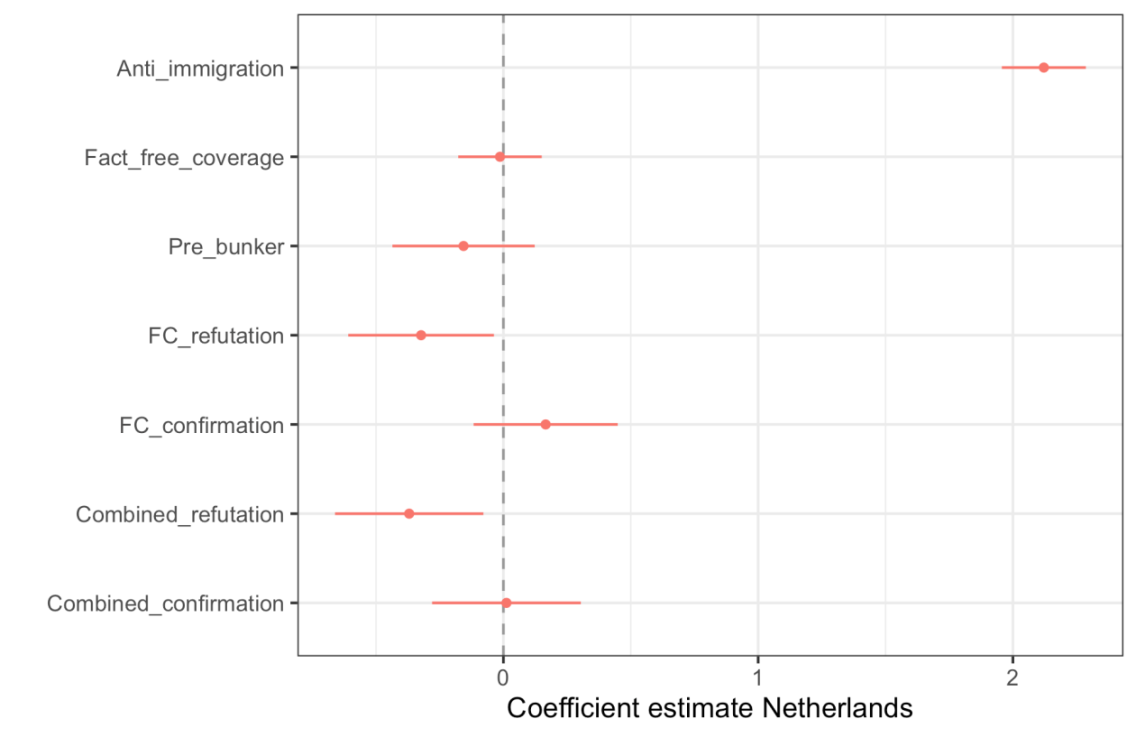


*Figure 2c.* The effects of corrective efforts on issue agreement in the Netherlands


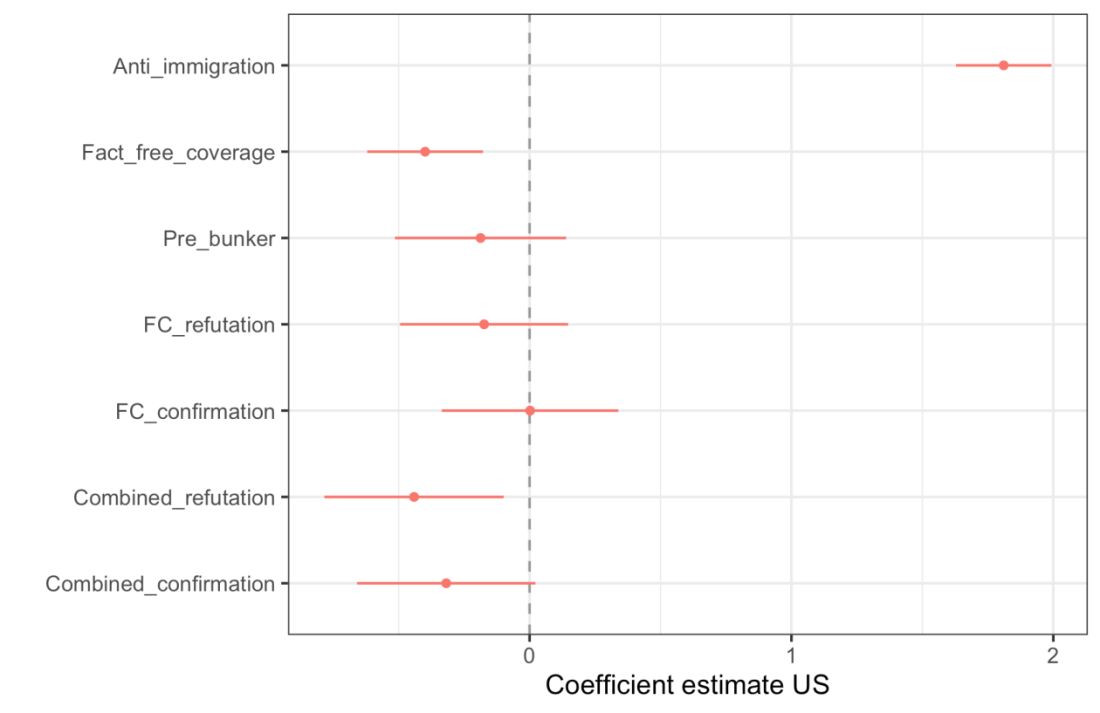


*Figure 2d.* The effects of corrective efforts on issue agreement in the US

*Note.* Figures depict regression coefficients (with 95% CI) for the effects of prior attitudes corresponding to misinformation (anti-immigration beliefs), fact-free misinformation, different types of corrections, and combined media literacy and fact-checking interventions. Figure 2a shows the effects of corrections on the dependent variable accuracy in the Netherlands, and Figure 2b depicts the effects of corrections on perceived accuracy in the US. Figure 2c and 2d show the effects of corrective information on issue agreement, in the Netherlands and the US respectively.

Supplemental Material – Appendix A

Figures A1 through A5 present: (1) fact-free misinformation; (2) evidence-based misinformation; (3) a media literacy intervention (forewarning); (4) a refuting fact-checker and (5) a confirming fact-checker


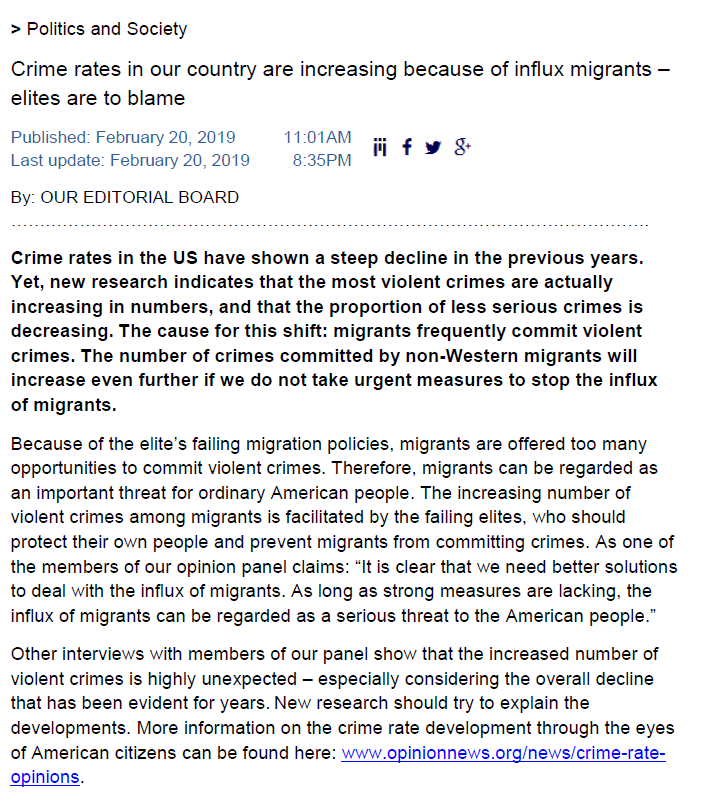


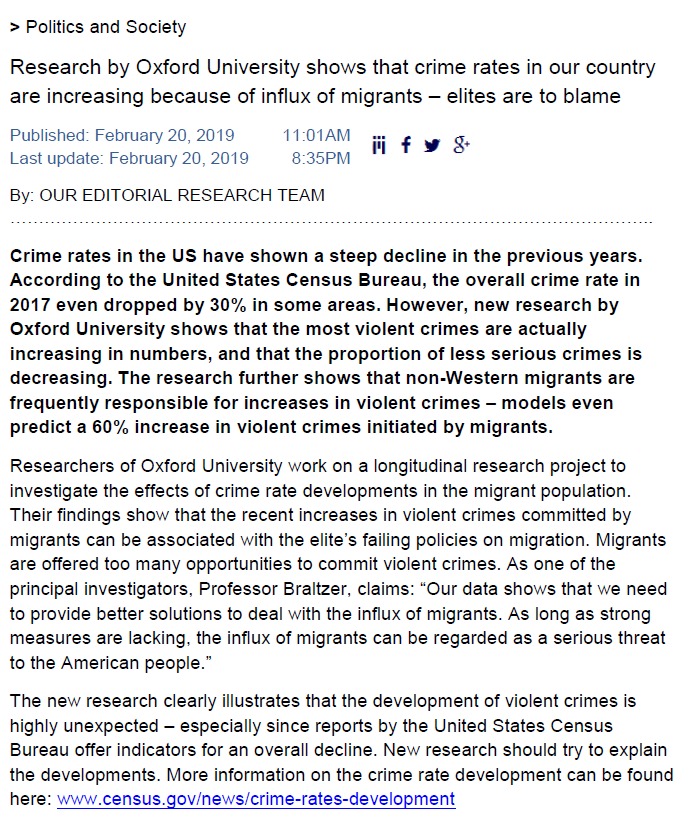


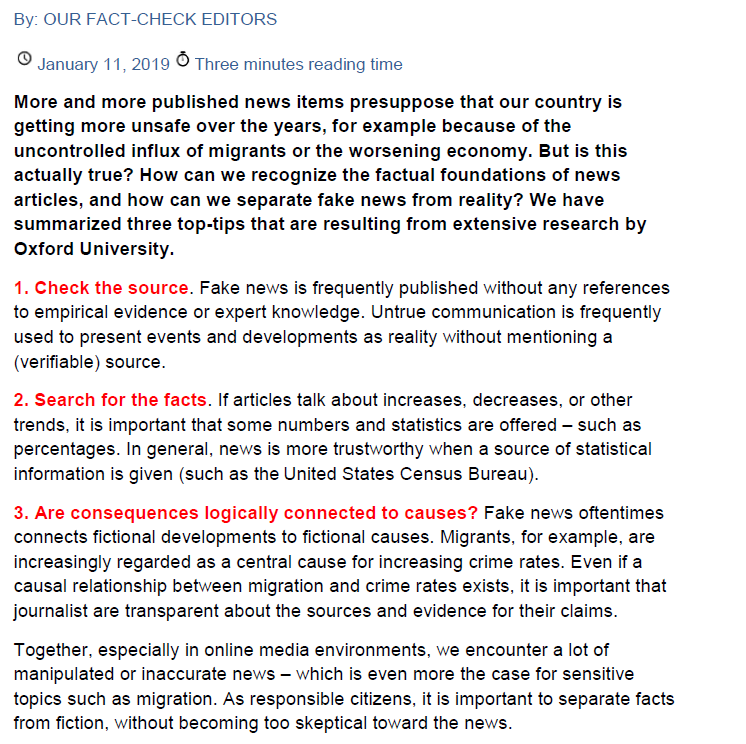


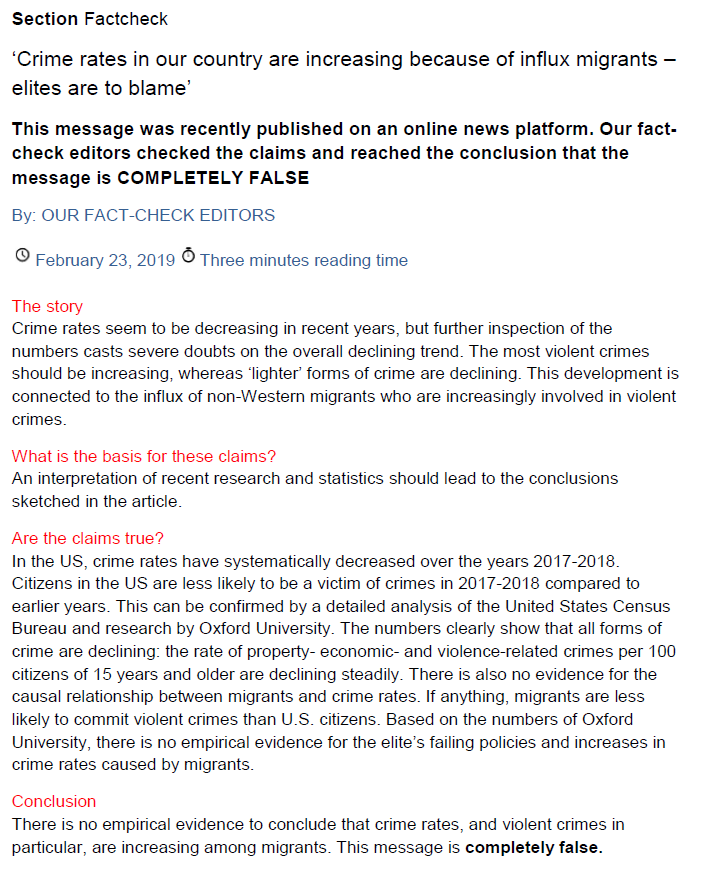


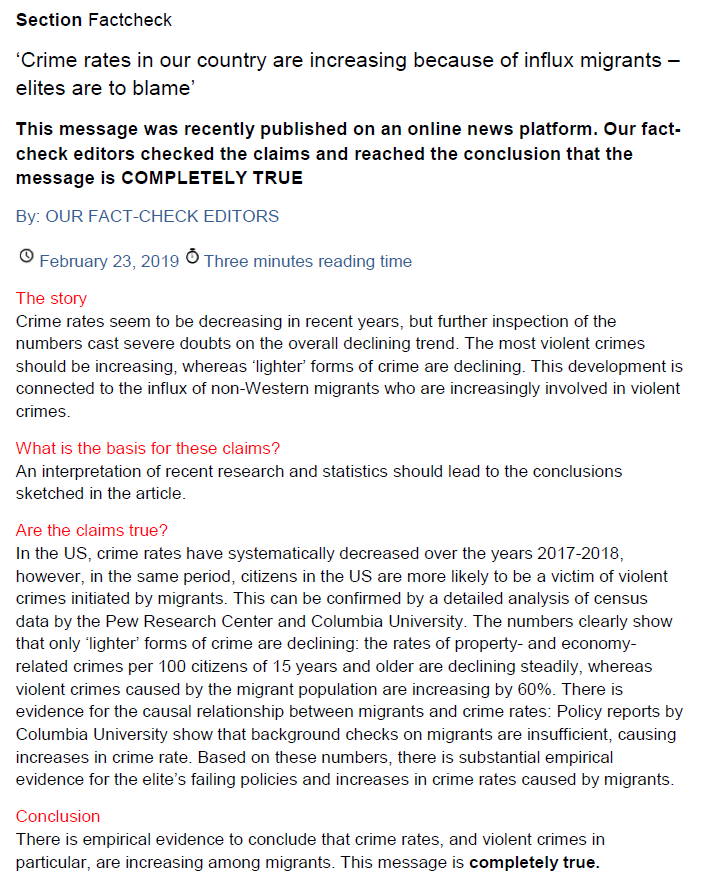

Supplement: Supplementary file 1 [file 22721042]
